# Supplementary material for: “Development” definitions of internally displaced people and the government: A study of the Chenchu tribe in the Nallamala forest of southern India
Source: Frontiers journal article supplement (doi:10.3389/fcosc.2023.1126168), 2023-04-05
Supplement: Data_Sheet_1.PDF [file Data_Sheet_1.PDF]

## **Appendix A: Chenchu People Question Guide**

**Age:** \_\_\_\_\_

**Gender:** \_\_\_\_\_

**Occupation:** \_\_\_\_\_

**Sector:** Deep-forest Chenchus / Intermediate Chenchus / Displaced Chenchus (**circle one**)

### **COMMON QUESTIONS**

#### **I. Development**

1. What words would you use to define development?

---

---

---

2. On a scale of 1-5, rate the existing socio-economic **development** of the Chenchu people living in the research area.

| Excellent (1) | Good (2) | Fair (3) | Poor (4) | Very poor (5) |
|---------------|----------|----------|----------|---------------|
|               |          |          |          |               |

State reasons for your choice.

---

---

---

3. How well do development projects relate to your idea of development?

---

---

---

4. On a scale of 1 to 5, how do you rate the effectiveness of the development projects toward improving the Chenchu living conditions?

| Excellent (1) | Good (2) | Fair (3) | Poor (4) | Very poor (5) |
|---------------|----------|----------|----------|---------------|
|               |          |          |          |               |

State reasons for your choice.

---

---

---

5. What are the common grievances of the Chenchu people in the research area?

---

---

---

- a. What are the common reasons for the grievances in Question 5?

6. How would you rate the relationship between the government and the people?

| Excellent (1) | Good (2) | Fair (3) | Poor (4) | Very poor (5) |
|---------------|----------|----------|----------|---------------|
|               |          |          |          |               |

State reasons for your choice.

7. What are the things you would like to change in the existing living conditions of the Chenchu people?

State reasons for your answer to Question 7.

8. What are the things you would **not** like to change in the existing living conditions of the Chenchu people?

State reasons for your answer to Question 8.

9. On a scale of 1 to 5, how would you rate the existing living condition of Chenchu people would **change in the future**?

| Excellent (1) | Good (2) | Fair (3) | Poor (4) | Very poor (5) |
|---------------|----------|----------|----------|---------------|
|               |          |          |          |               |

State reasons for your choice.

10. Would you like the Chenchu people to be a part of the development project by working with the government representatives for their projects?

(a) Yes \_\_\_\_\_ (b) No \_\_\_\_\_

State reasons for your choice.

---

---

---

11. What type of involvement of the Chenchu people in the development projects would improve their functioning?

---

---

---

12. What development projects relate to your idea of a good living condition?

---

---

---

13. Do you suggest any changes to the development projects?

---

---

---

State reasons for your answer.

---

---

---

## **II. Conservation**

1. What do you think are the most important things that need to be conserved in the Nallamala forest area?

---

---

---

2. Do you think the Chenchu tribal groups living in different locations are dependent on the forest products for livelihood?

(a) Yes \_\_\_\_\_ (b) No \_\_\_\_\_

State reasons for your answer.

---

---

---

3. Are the Chenchu people participating in conservation?

---

---

---

- a. If YES, how has the participation affected conservation?

---

---

---

- b. If NO, what are the reasons for non-participation?

- 
- 
- 
4. Do you think the Chenchu participation would lead to the development of the Chenchu people?

(a) Yes \_\_\_\_\_ (b) No \_\_\_\_\_

State reasons for your answer.

### **III. Displacement**

1. Do you think there has been an improvement in the living conditions of the Chenchu people since their displacement?

2. Do you think the displacement of the Chenchu people from the forest has conserved and protected the tiger population in the forest?

(a) Yes \_\_\_\_\_ (b) No \_\_\_\_\_

State reasons for your answer.

## **SPECIFIC QUESTIONS**

### **I. Development**

1. What daily activities define your social life?

2. Do you think these activities are important for leading your life? Give reasons for your answer.

### **II. Development Projects**

- a. Are you aware of the development projects of ITDA?

(a) Yes \_\_\_\_\_ (b) No \_\_\_\_\_

**If YES, answer the following questions:**

- a. Give an example of any development projects that you feel have improved your living condition.

---

---

---

- b. Why do you choose this particular project?

---

---

---

- c. How has this project influenced your life?

---

---

---

**If NO, answer the following questions:**

- a. Would you like to know about the development projects in the future?

---

---

---

- b. State reasons for your answer.

---

---

---

**III. Problems and Changes**

1. What are the common problems you face in your daily life?

---

---

---

- a. How do you tackle them?

---

---

---

2. Do you think the ITDA representatives or conservation officers can help in alleviating these problems?

---

---

---

- a. Why or why not?

---

---

---
