# Supplementary material for: “Development” definitions of internally displaced people and the government: A study of the Chenchu tribe in the Nallamala forest of southern India
Source: Frontiers journal article supplement (doi:10.3389/fcosc.2023.1126168), 2023-04-05
Supplement: Data_Sheet_2.PDF [file Data_Sheet_2.PDF]

## **Appendix B: Government Representatives Questionnaire**

**Age:** \_\_\_\_\_

**Gender:** \_\_\_\_\_

**Occupation:** \_\_\_\_\_

**Sector:** ITDA / Rural Development Trust (NGO) / NSTR (Conservation) (**Circle one**)

### **COMMON QUESTIONS**

#### **I. Development**

1. What words would you use to define development?

---

---

---

2. On a scale of 1-5, rate the existing socio-economic **development** of the Chenchu people living in the research area.

| Excellent (1) | Good (2) | Fair (3) | Poor (4) | Very poor (5) |
|---------------|----------|----------|----------|---------------|
|               |          |          |          |               |

State reasons for your choice.

---

---

---

3. How well do development projects relate to your idea of development?

---

---

---

4. On a scale of 1 to 5, how do you rate the effectiveness of the development projects toward improving the Chenchu living conditions?

| Excellent (1) | Good (2) | Fair (3) | Poor (4) | Very poor (5) |
|---------------|----------|----------|----------|---------------|
|               |          |          |          |               |

State reasons for your choice.

---

---

---

5. What are the common grievances of the Chenchu people in the research area?

---

---

---

- a. What are the common reasons for the grievances in Question 5?

---

---

---

6. How would you rate the relationship between the government and the people?

| Excellent (1) | Good (2) | Fair (3) | Poor (4) | Very poor (5) |
|---------------|----------|----------|----------|---------------|
|               |          |          |          |               |

State reasons for your choice.

---

---

---

7. What are the things you would like to change in the existing living conditions of the Chenchu people?

---

---

---

State reasons for your answer to Question 7.

---

---

---

8. What are the things you would **not** like to change in the existing living conditions of the Chenchu people?

---

---

---

State reasons for your answer to Question 8.

---

---

---

9. On a scale of 1 to 5, how would you rate the existing living condition of Chenchu people would **change in the future**?

| Excellent (1) | Good (2) | Fair (3) | Poor (4) | Very poor (5) |
|---------------|----------|----------|----------|---------------|
|               |          |          |          |               |

State reasons for your choice.

---

---

---

10. Would you like the Chenchu people to be a part of the development project by working with the government representatives for their projects?

(a) Yes \_\_\_\_\_ (b) No \_\_\_\_\_

State reasons for your choice.

---

---

---

11. What type of involvement of the Chenchu people in the development projects would improve their functioning?

---

---

---

12. What development projects relate to your idea of a good living condition?

---

---

---

13. Do you suggest any changes to the development projects?

---

---

---

State reasons for your answer.

---

---

---

## **II. Conservation**

1. What do you think are the most important things that need to be conserved in the Nallamala forest area?

---

---

---

2. Do you think the Chenchu tribal groups living in different locations are dependent on the forest products for livelihood?

(a) Yes \_\_\_\_\_ (b) No \_\_\_\_\_

State reasons for your answer.

---

---

---

3. Are the Chenchu people participating in conservation?

---

---

a. If YES, how has the participation affected conservation?

---

---

---

b. If NO, what are the reasons for non-participation?

- 
- 
- 
4. Do you think the Chenchu participation would lead to the development of the Chenchu people?

(a) Yes \_\_\_\_\_ (b) No \_\_\_\_\_

State reasons for your answer.

---

---

---

### **III. Displacement**

1. Do you think there has been an improvement in the living conditions of the Chenchu people since their displacement?

- 
- 
- 
2. Do you think the displacement of the Chenchu people from the forest has conserved and protected the tiger population in the forest?

(a) Yes \_\_\_\_\_ (b) No \_\_\_\_\_

State reasons for your answer.

---

---

---

## **SPECIFIC QUESTIONS**

### **I. Conservation, Displacement, and Development**

1. Why does the government want to displace the Chenchu people from their ancestral territory?

- 
- 
- 
2. What methods does the Government use to displace the Chenchu people from their ancestral territory to the new locations?

---

---

---

## **II. Prioritizing Development Projects**

1. What are some of the problems of the Chenchu people related to development?

---

---

---

2. On what basis do you prioritize the solving of the problems of the Chenchu people?

---

---

---

3. Are there any development projects that disturb the conservation of NSTR?

---

a. If YES, how do you negotiate with the development representatives regarding the disturbance?

---

---

---

- b. If NO, provide details on how conservation and development projects are co-working.

---

---

---
